# Supplementary material for: Marine-Derived Natural Product HDYL-GQQ-495 Targets P62 to Inhibit Autophagy
Source: MDPI journal article supplement (doi:10.3390/md21020068), 2023-01-20
Supplement: s1 [file s1]

# **Marine-derived natural product HDYL-GQQ-495 targets P62 to inhibit autophagy**

**Quanfu Li <sup>1,2,†</sup>, Jianjun Fan <sup>3,†</sup>, Yinghan Chen <sup>4</sup>, Yiyang Liu <sup>1</sup>, Hang Liu <sup>3</sup>, Wei Jiang <sup>1,\*</sup>, Dehai Li <sup>4,\*</sup> and Yongjun Dang <sup>3,1,\*</sup>**

<sup>1</sup> Key Laboratory of Metabolism and Molecular Medicine, The Ministry of Education, Department of Biochemistry and Molecular Biology, School of Basic Medical Sciences, Shanghai Medical College, Fudan University, Shanghai 200032, China

<sup>2</sup> Department of Immunology, School of Basic Medical Sciences, Shanghai Medical College, Fudan University, Shanghai 200032, China

<sup>3</sup> Center for Novel Target and Therapeutic Intervention, Institute of Life Sciences, Chongqing Medical University, Chongqing 400016, China

<sup>4</sup> Key Laboratory of Marine Drugs, Chinese Ministry of Education, School of Medicine and Pharmacy, Ocean University of China, Qingdao 266003, China

\* Correspondence: jiangw@fudan.edu.cn (W.J.); dehaili@ouc.edu.cn (D.L.); yjdang@cqmu.edu.cn (Y.D.)

† These authors contributed equally.

## Supplementary Figures

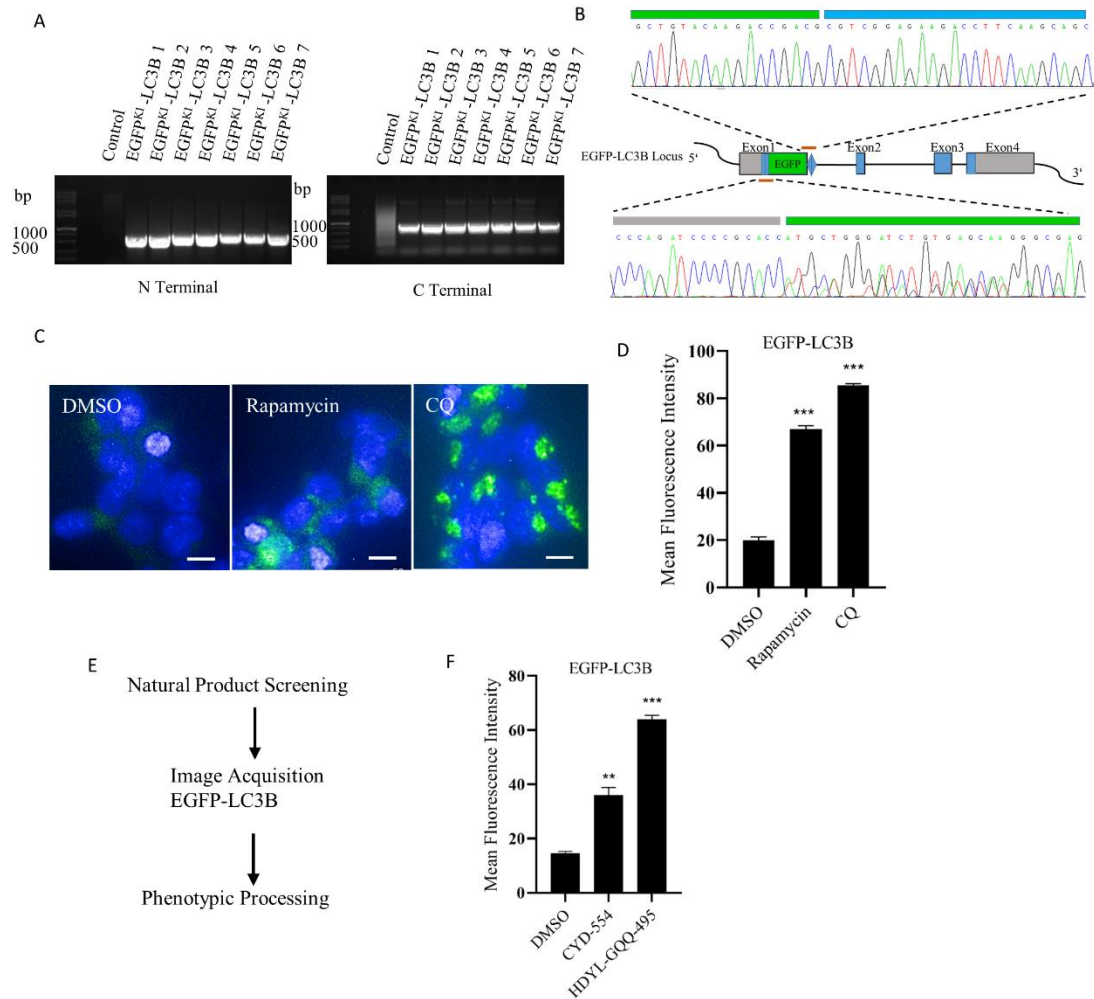

**Figure S1. Identification of EGFP-LC3B knock-in 293T cell lines**

(A) Genotyping PCR analysis of the integration of GFP in the indicated cells. Genomic DNA was amplified by PCR and subsequently sequenced.

(B) Representative graphic of genomic sequencing results around breakage end of the incorporated EGFP amplified from the EGFP-LC3-KI5 cell lines. The meaning of bars with different colors are listed below.

(C) Representative pictures of EGFP puncta merged with DAPI staining in the indicated cell lines with the indicated treatment. Scale bars, 10 $\mu$ m.

(D) Statistical analysis of the relative EGFP-LC3 expression in 293T EGFP<sup>KI</sup>-LC3B with the indicated treatment. Data are shown as the mean  $\pm$  SEM (n=3). \*\*\*P < 0.001, compared with DMSO.

(E) Schematic representation of the strategy of High-throughput screening in 293T EGFP<sup>KI</sup>-LC3B 5 cells.

(F) Statistical analysis of the relative EGFP-LC3 expression in 293T EGFP<sup>K1</sup>-LC3B with the indicated treatment. Data are shown as the mean  $\pm$  SEM (n=3). \*\*P < 0.01 \*\*\*P < 0.001, compared with DMSO.

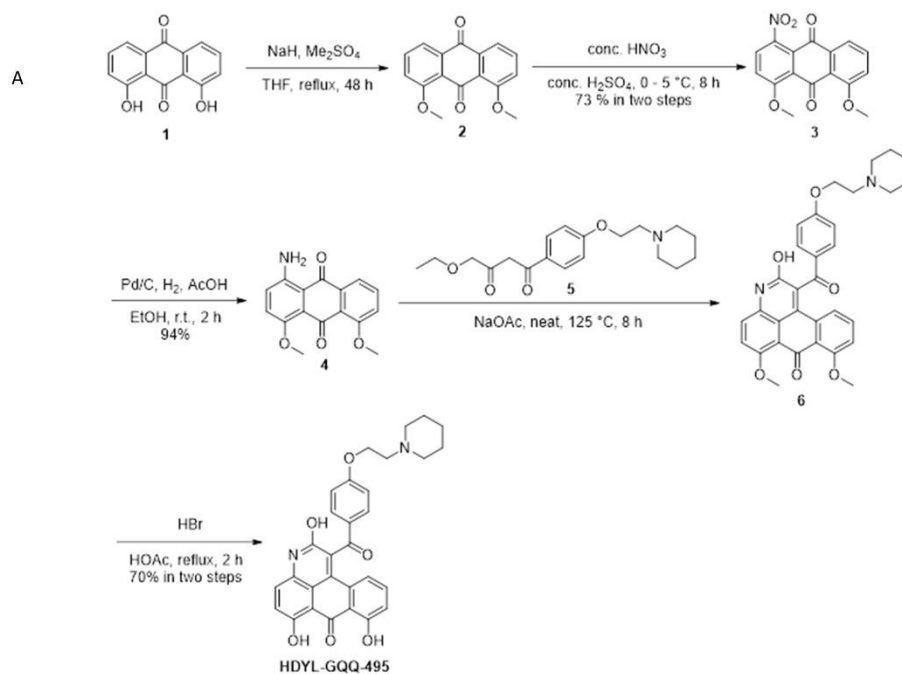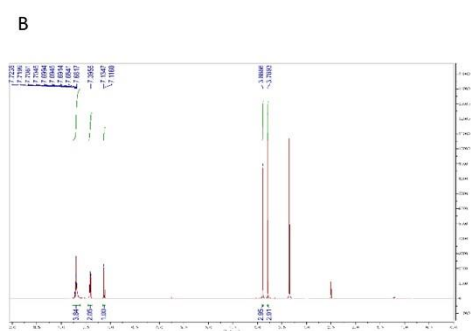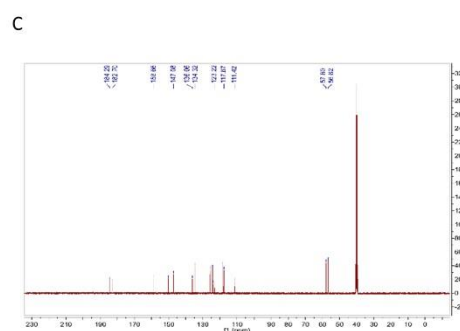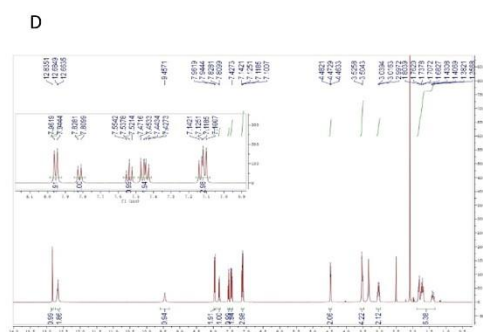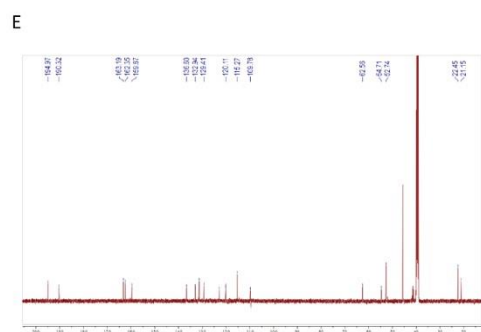

## Figure S2. Synthesis HDYL-GQQ-495

(A) Designed procedure to synthesize HDYL-GQQ-495.

(B)  $^1\text{H}$  NMR of **4**,  $d_6$ -DMSO.

(C)  $^{13}\text{C}$  NMR of **4**,  $d_6$ -DMSO.

(D)  $^1\text{H}$  NMR of **495**,  $d_6$ -DMSO.

(E)  $^{13}\text{C}$  NMR of **495**,  $d_6$ -DMSO.

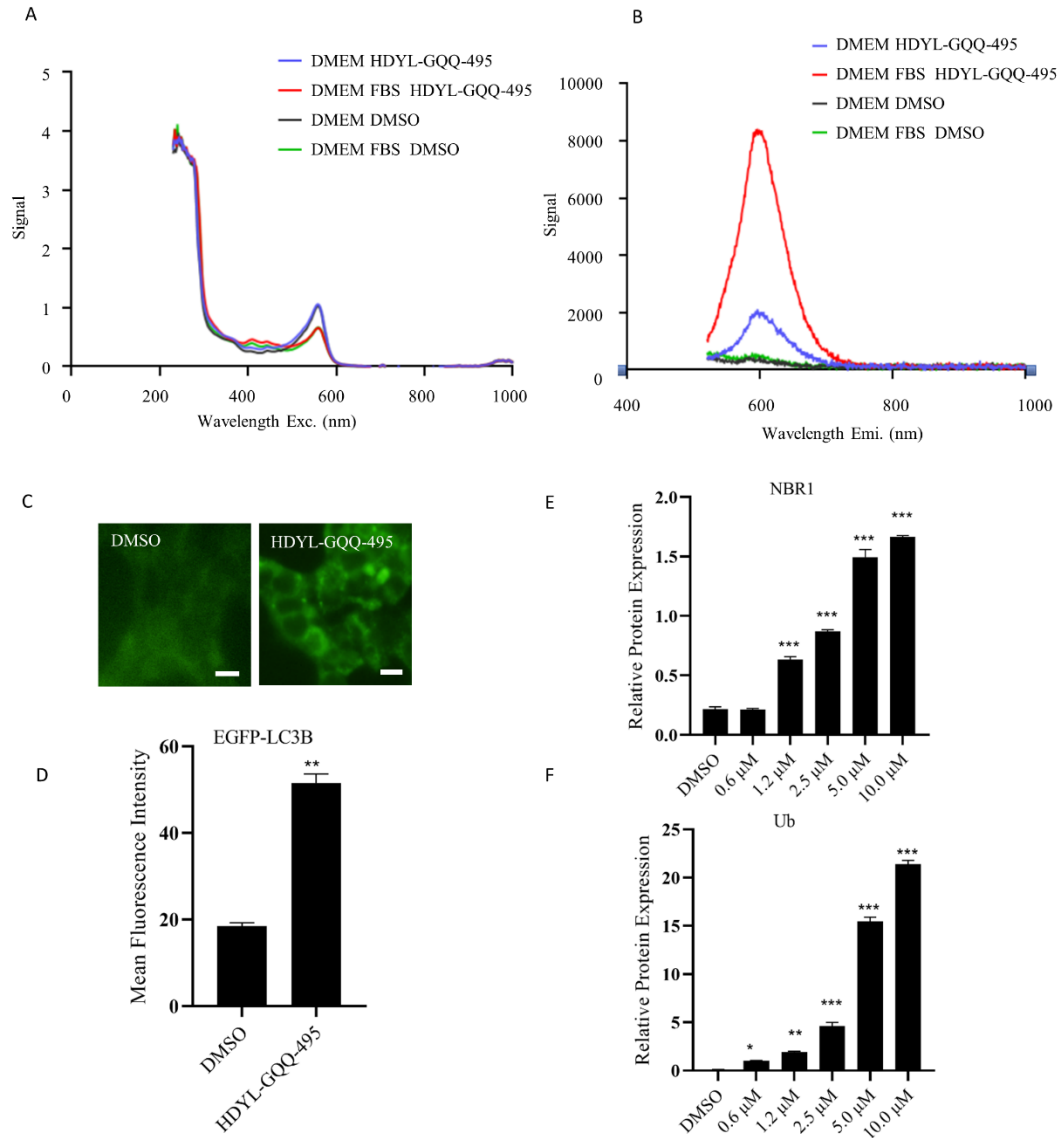

**Figure S3. HDYL-GQQ-495 is a fluorescent reagent with excitation at 500 nm and emission at 590 nm**

(A-B) The emission and excitation spectra spectra of GQQ-495 scanned by EnSpire.

(C) Representative pictures of EGFP puncta in the 293T EGFP<sup>KL</sup>-LC3B cells with HDYL-GQQ-495 and chloroquine. Scale bars, 10 $\mu\text{m}$ .

(D) Statistical analysis of the relative EGFP-LC3 expression in 293T EGFP<sup>K1</sup>-LC3B with the indicated treatment. Data are shown as the mean  $\pm$  SEM (n=3). \*\*P < 0.01, compared with DMSO.

(E) Statistical analysis of the relative NBR1 expression in HeLa cells with the indicated treatment. Data are shown as the mean  $\pm$  SEM (n=3). \*\*\*P < 0.001, compared with DMSO.

(F) Statistical analysis of the relative Ub expression in HeLa cells with the indicated treatment. Data are shown as the mean  $\pm$  SEM (n=3). \*P < 0.05, \*\*P < 0.01, \*\*\*P < 0.001, compared with DMSO.

**Supplementary Table S1. Relative mean GFP fluorescence**

| <b>Compounds</b> |                | <b>Relative Mean<br/>GFP</b> |
|------------------|----------------|------------------------------|
|                  | DMSO           | 100.00                       |
|                  | CYD-019        | 81.23                        |
|                  | CYD-008        | 109.21                       |
|                  | CYD-003        | 96.16                        |
|                  | CYD-049        | 79.94                        |
|                  | CYD-050        | 80.98                        |
|                  | CYD-061        | 94.37                        |
|                  | CYD-007        | 112.37                       |
|                  | CYD-018        | 102.46                       |
|                  | CYD-109        | 111.27                       |
|                  | CYD-101        | 105.45                       |
| CYD-111          | (HDYL-GQQ-495) | 143.36                       |
|                  | CYD-112        | 86.90                        |
|                  | CYD-113        | 80.45                        |
|                  | CYD-114        | 118.88                       |
|                  | CYD-115        | 109.90                       |
|                  | CYD-116        | 115.56                       |
|                  | CYD-117        | 96.59                        |
|                  | CYD-118        | 86.52                        |
|                  | CYD-119        | 88.88                        |
|                  | CYD-220        | 87.93                        |
|                  | CYD-221        | 99.56                        |
|                  | CYD-222        | 102.34                       |
|                  | CYD-223        | 89.94                        |
|                  | CYD-224        | 105.78                       |
|                  | CYD-225        | 80.90                        |
|                  | CYD-226        | 118.88                       |
|                  | CYD-227        | 83.45                        |
|                  | CYD-228        | 89.93                        |
|                  | CYD-229        | 92.40                        |
|                  | CYD-230        | 95.69                        |
|                  | CYD-331        | 90.80                        |
|                  | CYD-332        | 100.34                       |
|                  | CYD-333        | 118.98                       |
|                  | CYD-334        | 105.24                       |

|         |        |
|---------|--------|
| CYD-335 | 109.98 |
| CYD-336 | 88.79  |
| CYD-337 | 80.80  |
| CYD-338 | 83.59  |
| CYD-339 | 86.39  |
| CYD-440 | 98.84  |
| CYD-441 | 104.87 |
| CYD-442 | 110.34 |
| CYD-443 | 119.43 |
| CYD-444 | 89.99  |
| CYD-445 | 80.34  |
| CYD-446 | 90.36  |
| CYD-447 | 83.24  |
| CYD-448 | 97.24  |
| CYD-449 | 92.46  |
| CYD-450 | 100.35 |
| CYD-451 | 118.40 |
| CYD-452 | 83.33  |
| CYD-553 | 136.45 |
| CYD-554 | 102.93 |
| CYD-555 | 114.34 |
| CYD-556 | 108.46 |
| CYD-557 | 89.42  |
| CYD-558 | 93.35  |
| CYD-559 | 112.39 |
| CYD-560 | 94.89  |
| CYD-161 | 86.39  |
| CYD-262 | 90.38  |
| CYD-263 | 108.35 |
| CYD-264 | 119.44 |
| CYD-265 | 87.77  |
| CYD-246 | 83.59  |
| CYD-267 | 109.24 |
| CYD-268 | 113.24 |
| CYD-569 | 112.49 |
| CYD-270 | 100.03 |
| CYD-371 | 89.94  |
| CYD-022 | 84.30  |
| CYD-173 | 94.49  |

|         |        |
|---------|--------|
| CYD-074 | 99.98  |
| CYD-275 | 108.09 |
| CYD-076 | 117.77 |
| CYD-177 | 109.56 |
| CYD-554 | 129.50 |
| CYD-345 | 116.38 |
| CYD-137 | 119.34 |
| CYD-121 | 108.79 |
| CYD-502 | 99.38  |
| H-002   | 90.78  |
| H-003   | 94.38  |
| H-004   | 106.89 |
| H-005   | 110.38 |
| H-006   | 117.39 |
| H-007   | 113.21 |
| H-008   | 115.89 |
| H-009   | 116.47 |
| H-010   | 102.53 |
| H-011   | 87.95  |
| H-012   | 117.74 |
| H-013   | 117.51 |
| H-014   | 109.09 |
| H-015   | 91.34  |
| H-016   | 92.16  |
| H-017   | 94.41  |
| H-018   | 90.00  |
| H-019   | 103.16 |
| H-020   | 97.99  |
| H-021   | 115.54 |
| H-022   | 117.43 |
| H-023   | 107.04 |
| H-024   | 89.54  |
| H-025   | 85.99  |
| H-026   | 90.47  |
| H-027   | 91.83  |
| H-028   | 91.68  |
| H-029   | 113.26 |
| H-030   | 111.04 |
| H-031   | 90.70  |



|       |        |
|-------|--------|
| H-032 | 113.93 |
| H-033 | 112.82 |
| H-034 | 85.42  |
| H-035 | 88.66  |
| H-036 | 113.67 |
| H-037 | 130.48 |
| H-038 | 96.36  |
| H-039 | 93.28  |
| H-040 | 83.15  |
| H-041 | 110.90 |
| H-042 | 88.60  |
| H-043 | 98.99  |
| H-044 | 91.94  |
| H-045 | 85.55  |
| H-046 | 90.45  |
| H-047 | 106.86 |
| H-048 | 105.78 |
| H-049 | 113.71 |
| H-050 | 115.72 |
| H-051 | 109.65 |
| H-052 | 82.00  |
| H-053 | 98.22  |
| H-054 | 95.45  |
| H-055 | 116.60 |
| H-056 | 107.40 |
| H-057 | 113.79 |
| H-058 | 114.00 |
| H-059 | 107.62 |
| H-060 | 88.22  |
| H-061 | 108.68 |
| H-062 | 93.83  |
| H-063 | 105.42 |
| H-064 | 88.77  |
| H-065 | 106.45 |
| B-103 | 96.99  |
| B-104 | 117.45 |
| B-105 | 98.20  |
| B-106 | 108.83 |
| B-107 | 103.60 |

|       |        |
|-------|--------|
| B-108 | 92.53  |
| B-109 | 101.17 |
| B-110 | 91.52  |
| B-111 | 103.18 |
| B-112 | 93.30  |
| B-113 | 89.47  |
| B-114 | 109.36 |
| B-115 | 100.08 |
| B-116 | 90.43  |
| B-117 | 107.42 |
| B-118 | 82.90  |
| B-119 | 132.23 |
| B-120 | 102.83 |
| B-121 | 116.82 |
| B-122 | 118.70 |
| B-123 | 91.09  |
| B-124 | 119.14 |
| B-125 | 94.64  |
| B-126 | 106.84 |
| B-127 | 100.32 |
| B-128 | 108.96 |
| B-129 | 115.95 |
| B-130 | 108.88 |
| B-131 | 102.37 |
| B-132 | 115.55 |
| B-133 | 105.42 |
| B-134 | 105.30 |
| B-135 | 100.65 |
| B-136 | 107.97 |
| B-137 | 116.60 |
| B-138 | 105.47 |
| B-139 | 101.73 |
| B-140 | 106.23 |
| B-141 | 96.78  |
| B-142 | 112.80 |
| B-143 | 82.71  |
| B-144 | 83.60  |
| B-145 | 88.78  |
| B-146 | 103.16 |

|       |        |
|-------|--------|
| B-147 | 100.34 |
| B-148 | 113.88 |
| B-149 | 106.66 |
| B-150 | 106.05 |
| B-151 | 110.37 |
| B-152 | 88.41  |
| B-153 | 119.71 |
| B-154 | 113.86 |
| B-155 | 115.81 |
| B-156 | 96.61  |
| I-100 | 93.37  |
| I-101 | 95.63  |
| I-102 | 97.60  |
| I-103 | 98.28  |
| I-104 | 91.30  |
| I-105 | 94.96  |
| I-106 | 83.32  |
| I-107 | 103.14 |
| I-108 | 102.34 |
| I-109 | 106.13 |
| I-110 | 96.25  |
| I-111 | 105.08 |
| I-112 | 81.97  |
| I-113 | 126.40 |
| I-114 | 99.53  |
| I-115 | 105.03 |
| I-116 | 92.10  |
| I-117 | 119.52 |
| I-118 | 108.37 |
| I-119 | 107.24 |
| I-120 | 101.38 |
| I-121 | 119.57 |
| I-122 | 105.77 |
| I-123 | 91.69  |
| I-124 | 84.08  |
| I-125 | 98.82  |
| I-126 | 88.03  |
| I-127 | 95.98  |
| I-128 | 119.73 |

|       |        |
|-------|--------|
| I-129 | 81.64  |
| I-130 | 107.43 |
| I-131 | 90.40  |
| I-132 | 103.88 |
| I-133 | 102.92 |
| I-134 | 100.35 |
| I-135 | 107.75 |
| I-136 | 116.02 |
| I-137 | 116.30 |
| I-138 | 107.34 |
| I-139 | 84.38  |
| I-140 | 114.17 |
| I-141 | 111.76 |
| I-142 | 93.99  |
| I-143 | 113.20 |
| I-144 | 119.61 |
| I-145 | 85.57  |
| I-146 | 118.18 |
| I-147 | 112.43 |
| G-002 | 88.19  |
| G-003 | 108.90 |
| G-004 | 84.44  |
| G-005 | 84.84  |
| G-006 | 105.81 |
| G-007 | 101.29 |
| G-008 | 81.55  |
| G-009 | 86.63  |
| G-010 | 87.51  |
| G-011 | 124.35 |
| G-012 | 106.90 |
| G-013 | 102.08 |
| G-014 | 89.21  |
| G-015 | 106.38 |
| G-016 | 84.42  |
| G-017 | 90.32  |
| G-018 | 85.98  |
| G-019 | 81.00  |
| G-020 | 82.01  |
| G-021 | 119.96 |

|       |        |
|-------|--------|
| G-022 | 110.98 |
| G-023 | 84.83  |
| G-024 | 91.42  |
| G-025 | 107.91 |
| G-026 | 83.52  |
| G-027 | 88.17  |
| G-028 | 91.14  |
| G-029 | 114.05 |
| G-030 | 107.83 |
| G-031 | 111.52 |
| G-032 | 113.97 |
| G-033 | 92.00  |
| G-034 | 106.67 |
| G-035 | 83.94  |
| G-036 | 99.69  |
| G-037 | 83.78  |
| G-038 | 111.99 |
| G-039 | 107.14 |
| G-040 | 87.76  |
| G-041 | 93.72  |
| G-042 | 92.03  |
| G-043 | 81.68  |
| G-044 | 113.96 |
| G-045 | 101.17 |
| G-046 | 110.99 |
| G-047 | 118.53 |
| G-048 | 81.64  |
| G-049 | 112.78 |
| G-050 | 90.13  |
| G-051 | 110.09 |
| G-052 | 84.75  |
| G-053 | 84.14  |
| G-054 | 91.45  |
| G-055 | 107.41 |
| G-056 | 116.24 |
| G-057 | 80.02  |
| G-058 | 103.12 |
| G-059 | 119.47 |
| G-060 | 97.63  |

|       |        |
|-------|--------|
| G-061 | 115.67 |
| G-062 | 114.53 |
| G-063 | 83.63  |
| G-064 | 109.17 |
| G-065 | 91.25  |
| G-066 | 104.82 |
| P-11  | 100.66 |
| P-12  | 101.19 |
| P-13  | 107.18 |
| P-14  | 96.26  |
| P-15  | 116.11 |
| P-16  | 112.17 |
| P-17  | 118.37 |
| P-18  | 98.10  |
| P-19  | 80.12  |
| P-20  | 80.01  |
| P-21  | 108.55 |
| P-22  | 119.02 |
| P-23  | 111.27 |
| P-24  | 93.92  |
| P-25  | 99.62  |
| P-26  | 108.19 |
| P-27  | 84.29  |
| P-28  | 98.69  |
| P-29  | 80.62  |
| P-30  | 117.39 |
| P-31  | 92.31  |
| P-32  | 111.64 |
| P-33  | 100.38 |
| P-34  | 100.46 |
| P-35  | 114.61 |
| P-36  | 106.89 |
| P-37  | 118.78 |
| P-38  | 104.17 |
| P-39  | 95.30  |
| P-40  | 97.53  |
| P-41  | 106.76 |
| P-42  | 101.54 |
| P-43  | 86.70  |

|       |        |
|-------|--------|
| P-44  | 92.22  |
| P-45  | 120.73 |
| P-46  | 106.08 |
| P-47  | 112.74 |
| K-015 | 87.02  |
| K-016 | 99.62  |
| K-017 | 91.55  |
| K-018 | 82.35  |
| K-019 | 85.21  |
| K-020 | 91.96  |
| K-021 | 80.83  |
| K-022 | 88.85  |
| K-023 | 86.40  |
| K-024 | 101.23 |
| K-025 | 93.07  |
| K-026 | 99.09  |
| K-027 | 80.42  |
| K-028 | 83.02  |
| K-029 | 94.37  |
| K-030 | 109.49 |
| K-031 | 88.81  |
| K-032 | 110.23 |
| K-033 | 113.09 |
| K-034 | 90.84  |
| K-035 | 106.10 |
| K-036 | 116.18 |
| K-037 | 86.72  |
| K-038 | 85.48  |
| K-039 | 107.15 |
| K-040 | 94.70  |
| K-041 | 83.41  |
| K-042 | 102.91 |
| K-043 | 119.77 |
| K-044 | 93.02  |
| K-045 | 92.11  |
| K-046 | 97.52  |
| K-047 | 82.64  |
| K-048 | 99.80  |
| K-049 | 103.86 |

|       |        |
|-------|--------|
| K-050 | 119.59 |
| K-051 | 105.49 |
| K-052 | 118.04 |
| K-053 | 94.88  |
| K-054 | 106.33 |
| K-055 | 82.77  |
| K-056 | 96.69  |
| K-057 | 93.52  |
| K-058 | 119.54 |
| K-059 | 111.13 |
| K-060 | 83.33  |
| K-061 | 94.57  |
| K-062 | 111.31 |
| K-063 | 102.54 |
| K-064 | 95.88  |
| K-065 | 109.71 |
| K-066 | 109.92 |
| K-067 | 116.68 |
| K-068 | 96.97  |
| K-069 | 102.22 |
| K-070 | 110.58 |
| K-071 | 91.59  |
| K-072 | 86.93  |
| K-073 | 101.82 |
| M-12  | 108.88 |
| M-13  | 103.08 |
| M-14  | 87.66  |
| M-15  | 106.49 |
| M-16  | 102.80 |
| M-17  | 98.67  |
| M-18  | 88.41  |
| M-19  | 80.71  |
| M-20  | 90.28  |
| M-21  | 91.21  |
| M-22  | 84.37  |
| M-23  | 118.55 |
| M-24  | 91.46  |
| M-25  | 108.85 |
| M-26  | 104.21 |



|      |        |
|------|--------|
| M-27 | 84.84  |
| M-28 | 97.81  |
| M-29 | 95.94  |
| M-30 | 84.65  |
| M-31 | 111.05 |
| M-32 | 81.26  |
| M-33 | 84.87  |
| M-34 | 108.71 |
| M-35 | 107.97 |
| M-36 | 88.36  |
| M-37 | 94.72  |
| M-38 | 80.03  |
| M-39 | 114.95 |
| M-40 | 95.74  |
| M-41 | 116.32 |
| M-42 | 102.70 |
| M-43 | 95.59  |
| M-44 | 102.15 |
| M-45 | 96.47  |
| M-46 | 101.09 |
| M-47 | 113.10 |
| M-48 | 91.08  |
| M-49 | 101.50 |
| M-50 | 92.12  |
| M-51 | 83.83  |
| M-52 | 108.95 |
| M-53 | 114.75 |
| M-54 | 108.88 |
| M-55 | 115.01 |
| M-56 | 114.13 |
| M-57 | 91.10  |
| M-58 | 112.20 |
| M-59 | 106.52 |
| M-60 | 100.56 |
| M-61 | 91.76  |
| M-62 | 104.85 |
| M-63 | 82.10  |
| M-64 | 111.35 |
| M-65 | 97.98  |

|      |        |
|------|--------|
| M-66 | 85.97  |
| M-67 | 105.54 |
| M-68 | 118.86 |
| M-69 | 109.72 |
| M-70 | 106.92 |
| M-71 | 88.70  |
| M-72 | 92.58  |
| M-73 | 103.31 |
| M-74 | 83.48  |
| M-75 | 86.24  |
| M-76 | 97.84  |
| M-77 | 107.43 |
| M-78 | 100.78 |
| M-79 | 110.58 |
| M-80 | 84.95  |
| M-81 | 101.02 |
| M-82 | 110.59 |
| M-83 | 84.83  |
| M-84 | 84.37  |
| M-85 | 110.98 |
| M-86 | 84.77  |
| M-87 | 96.40  |
| M-88 | 112.19 |
| M-89 | 87.13  |
| M-90 | 87.93  |
| M-91 | 88.23  |
| M-92 | 90.90  |

---
